# Supplementary material for: SARS-CoV-2 infection dynamics revealed by wastewater sequencing analysis and deconvolution
Source: bioRxiv or medRxiv preprint supplement (doi:10.1101/2021.11.30.21266952), 2022-05-03
Supplement: Supplementary file [file media-1.pdf]

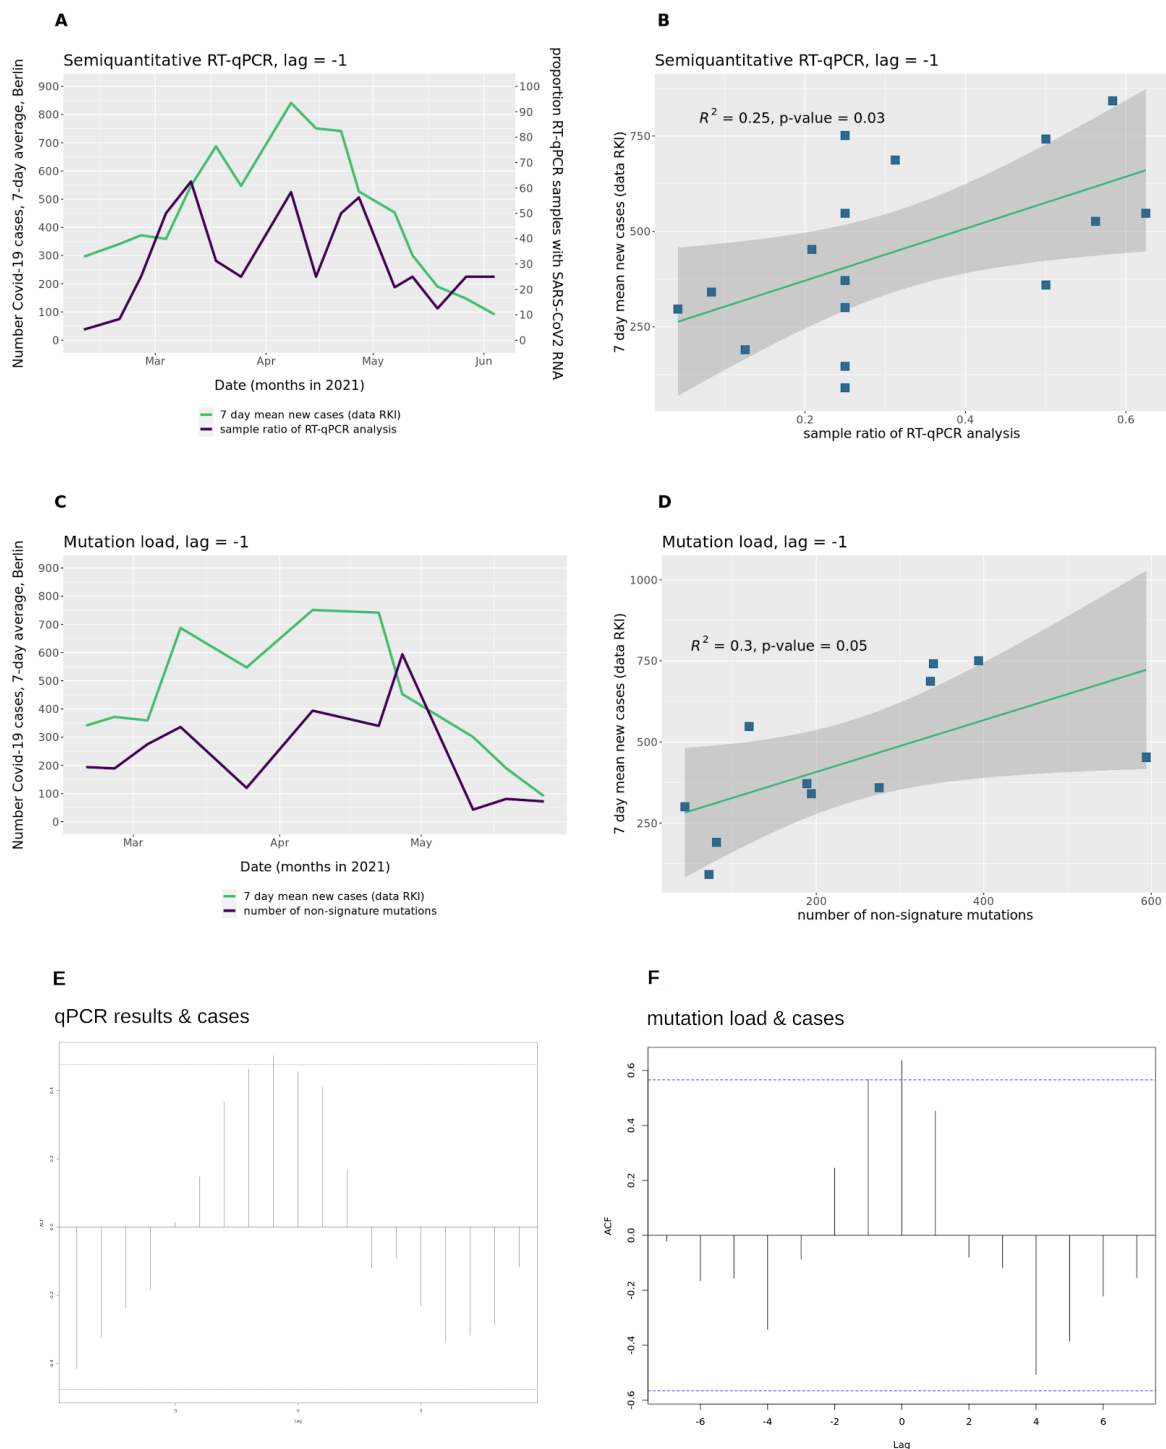

**Supplementary Figure 1:** A) 7 days average of COVID-19 cases in Berlin, data from Robert Koch-Institute (RKI) (light green, left axis) and proportion of samples positively determined SARS-CoV-2 RNA by RT-qPCR (dark violet, right axis) over Feb - Jun 2021 with applied lag = -1 on the RT-qPCR data. B) Correlation of 7 days average of COVID-19 cases in Berlin and

proportion of samples with positively determined SARS-CoV-2 RNA by RT-qPCR with applied lag = -1 on the RT-qPCR data . C) 7 days average of COVID-19 cases in Berlin (RKI) (light green) and mutation load (number of non-signature mutations detected) (dark violet) over Feb - Jun 2021 with applied lag = -1 on the mutation load data. D) Correlation of 7 days average of COVID-19 cases in Berlin and mutation load (number of non-signature mutations detected) with applied lag = -1 on the mutation load data. E) Plotted cross correlation function up to  $h=6$  for the proportion of samples with positively determined SARS-CoV-2 RNA by RT-qPCR data and the 7 days average of COVID-19 cases in Berlin data. F) Plotted cross correlation function up to  $h=6$  for mutation load data and the 7 days average of COVID-19 cases in Berlin data.

For all figures samples from 4 different wastewater treatment plants were used and pooled by day. For A,B,E all samples were taken into account. For C,D,F only samples with a reference genome coverage  $\geq 90\%$  were taken into account.

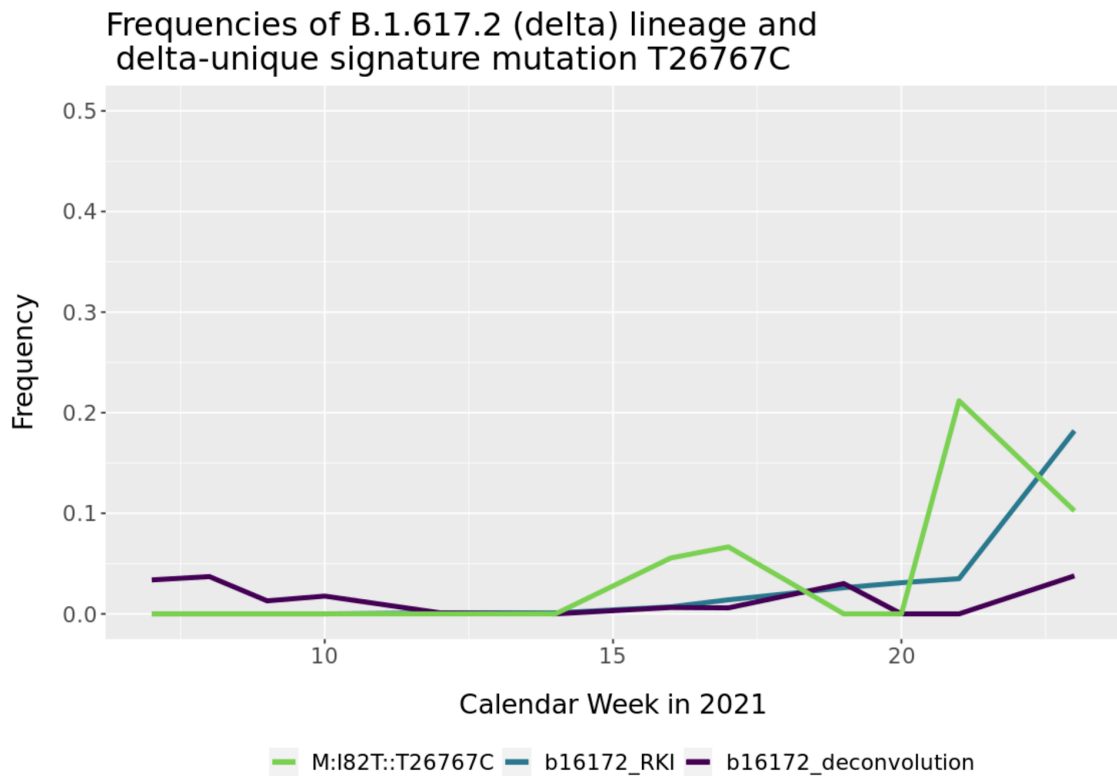

**Supplementary Figure 2:** Frequency values for the mutation M:I82T::T26767C, deconvoluted abundance values for B.1.617.2 (delta) and the abundance values for B.1.617.2 as reported by the Robert-Koch Institute (RKI). Samples from 4 different treatment plants across Berlin were used and pooled by week using the weighted mean with read-numbers as weights for the deconvolution data and simple mean for the mutation data.
